# Supplementary material for: Diagnostic and Prognostic Implications of Caspase-1 and PD-L1 Co-Expression Patterns in Myelodysplastic Syndromes
Source: MDPI journal article supplement (doi:10.3390/cancers13225712), 2021-11-15
Supplement: s1 [file s1]

## Supplemental Material

**Suppl. Table S1: Detailed clinical data from MDS patients and controls.**

| MDS patients     |     |        |       |       |       |      |       |      |      |      |     |      |                                                |           |           |       |
|------------------|-----|--------|-------|-------|-------|------|-------|------|------|------|-----|------|------------------------------------------------|-----------|-----------|-------|
|                  | N   | IPSS-R | Casp1 | PD1   | PD-L1 | C/P  | Hb    | ANC  | Mo   | Tc   | CRP | bBM  | cBM                                            | first DMT | allo HSCT | OS    |
| Lower risk       | 1   | 4      | 8     | 4     | 12    | 0.67 | 75    | 1.96 | 1.66 | 54   | 60  | 2    | ▲                                              | AZA       | Yes       | Alive |
|                  | 2*  | 3.5    | 1     | 10    | 5.5   | 0.18 | 82    | 0.86 | 0.01 | 85   | 11  | 2    | ▼                                              | None*     | No        | Alive |
|                  | 3#  | 2.5    | 20    | 10    | 1     | 20   | 155   | 4.95 | 0.82 | 87   | 35  | 3    | =▲                                             | AZA       | No        | 1697  |
|                  | 4   | 4      | 9     | 2     | 3.5   | 2.57 | 64    | 0.23 | 0.03 | 42   | 2   | 3    | ▼                                              | CY        | No        | 356   |
|                  | 5   | 3      | 11.5  | 5     | 2     | 5.75 | 113   | 3.51 | 0.64 | 110  | 3   | 4    | ▲                                              | AZA       | No        | 1343  |
|                  | 6   | 2      | 9     | 0     | 0     | x    | 102   | 1.27 | 0.37 | 6    | 3   | 0    | =                                              | Other     | No        | 151   |
|                  | 7   | 2      | 13.5  | 1     | 1     | 13.5 | 100   | 4.11 | 0.32 | 280  | 1.7 | 4    | ▲                                              | Not known | No        | 1247  |
|                  | 8   | 3.5    | 18    | 1     | 0.5   | 36   | 76    | 3.13 | 0.25 | 434  | 11  | 4    | =                                              | LEN       | No        | 107   |
|                  | 9*  | 4      | 2     | 2     | 1     | 2    | 137   | 1.84 | 0.28 | 45   | 3   | 3    | =                                              | AZA       | No        | 663   |
|                  | 10  | 4      | 8.5   | 4     | 5     | 1.7  | 91    | 1.32 | 0.16 | 67   | 32  | 4    | =▲                                             | Not known | No        | 1799  |
| Higher risk      | 11  | 7      | 1.5   | 1     | 10    | 0.15 | 88    | 0.17 | 0.22 | 13   | 148 | 13   | ▲                                              | LEN       | No        | 183   |
|                  | 12# | 6      | 4.5   | 10    | 21    | 0.21 | 74    | 0.71 | 0.05 | 22   | 6   | 7    | ▲                                              | CYT/IDA   | Yes       | Alive |
|                  | 13  | 4.5    | 6.5   | 1     | 3     | 2.17 | 128   | 1.53 | 0.1  | 57   | 0   | 4    | ▲                                              | AZA       | No        | Alive |
|                  | 14  | 4.5    | 6     | 10    | 3.5   | 1.71 | 91    | 0.15 | 0.14 | 175  | 14  | 8    | =▲                                             | AZA       | Yes       | Alive |
|                  | 15  | 4.5    | 3.5   | 1     | 1.5   | 2.33 | 80    | 1.3  | 0.25 | 7    | 3   | 2    | =                                              | CY/TG     | Yes       | Alive |
|                  | 16* | 9      | 17.5  | 4     | 2     | 8.75 | 68    | 1.93 | 0.3  | 64   | 4   | 15   | =▲                                             | AZA       | No        | 138   |
|                  | 17  | 7      | 1.5   | 1     | 2.5   | 0.6  | 70    | 0.21 | 0    | 23   | 20  | 15   | =▲                                             | AZA       | No        | 321   |
|                  | 18  | 5.5    | 7.5   | 1     | 2     | 3.75 | 111   | 2.32 | 0.73 | 96   | 18  | 11   | n.a.                                           | None      | No        | 15    |
|                  | 19  | 5      | 3.5   | 4     | 1     | 3.5  | 90    | 4.17 | 0.08 | 78   | 47  | 8    | ▲                                              | AZA       | No        | 158   |
|                  | 20  | 6.5    | 4     | 4     | 7     | 0.57 | 69    | 1.1  | 0.14 | 229  | 3   | 10   | =▲                                             | AZA       | No        | 625   |
| Controls         |     |        |       |       |       |      |       |      |      |      |     |      |                                                |           |           |       |
|                  | N   | Casp1  | PD1   | PD-L1 | C/P   | Hb   | ANC   | Mo   | Tc   | CRP  | bBM | cBM  | Conditions                                     |           |           |       |
| Non-inflammatory | C1  | 0      | 10    | 4     | 0     | 110  | 4.61  | 0.37 | 191  | 3    | <5  | =    | Suspected transfusion reaction                 |           |           |       |
|                  | C2# | 0      | 1     | 2     | 0     | n.a. | n.a.  | n.a. | n.a. | n.a. | <5  | =    | Localized (extramedullary) follicular lymphoma |           |           |       |
|                  | C3  | 7.5    | 1     | 5     | 1.50  | 153  | n.a.  | n.a. | 310  | 4    | <5  | =    | Solitary (extramedullary) plasmocytoma         |           |           |       |
| Inflammatory     | C4  | 9      | 10    | 2     | 4.50  | 139  | n.a.  | n.a. | 331  | 115  | <5  | =    | Hodgkin lymphoma                               |           |           |       |
|                  | C5  | 14     | 6     | 6     | 2.33  | 124  | 22.01 | 1.92 | 334  | 111  | <5  | =    | Pulmonary adenocarcinoma                       |           |           |       |
|                  | C6  | 22     | 1     | 15    | 1.47  | 116  | 4.08  | n.a. | 226  | 3    | <5  | n.a. | Diffuse large B-cell lymphoma                  |           |           |       |
|                  | C7  | 15     | 1     | 16.5  | 0.91  | 82   | 3.73  | n.a. | 29   | 25   | <5  | =▲   | AIDS with cerebral toxoplasmosis               |           |           |       |
|                  | C8  | 16     | 2     | 2.5   | 6.40  | 79   | 8.36  | n.a. | 502  | 97   | <5  | =▲   | Post-transplant lymphoproliferative disorder   |           |           |       |
|                  | C9# | 19     | 10    | 21    | 0.91  | 84   | 4.55  | n.a. | 107  | 58   | <5  | ▲    | Multicentric Castleman Disease                 |           |           |       |

Patient and control numbers [N]; International Prognostic Scoring System revised [IPSS-R]; Casp1: Caspase1 [H-score]; PD1: Programmed cell death protein 1 [H-score]; PD-L1: Programmed cell death 1 ligand 1 [H-score]; C/P: Casp1/PD-L1 Ratio; Hb: hemoglobin [g/L]; ANC: absolute neutrophil counts [10<sup>9</sup>/L]; Mo: monocytes [10<sup>9</sup>/L]; Tc: thrombocytes [10<sup>9</sup>/L]; CRP: C-reactive protein [mg/L]; bBM: BM blasts [%], cBM: cellularity of BM (▼: hypocellular, =: normocellular, ▲: hypercellular). DMT: disease-modifying treatment (AZA: azacytidine; LEN: lenalidomide;

CYT/IDA: cytarabine/idarubicin; CY/TG: cyclosporine/ thymoglobulin; \*: on hold for allo HSCT); allo HSCT: allogenic hematopoietic stem-cell transplantation, OS: overall survival [days].

IHC pictures of patients/controls with # are show in Suppl. Figure 1 and 2, respectively. Patients with \* had unexpected patterns and were investigated in more detail. Non-available (n.a.) laboratory values in controls are from primary/secondary care facility BM specimen examined in our tertiary care hospital.

**Suppl. Table S2: Correlations of immune-related biomarkers in MDS patients and controls.**

|       | MDS patients |                               |                                | Controls |                                |                                |
|-------|--------------|-------------------------------|--------------------------------|----------|--------------------------------|--------------------------------|
|       | Casp1        | PD1                           | PD-L1                          | Casp1    | PD1                            | PD-L1                          |
| Casp1 |              | rho = 0.01<br><i>p</i> = 0.98 | rho = -0.41<br><i>p</i> = 0.07 |          | rho = -0.06<br><i>p</i> = 0.88 | rho = 0.64<br><i>p</i> = 0.06  |
| PD1   |              |                               | rho = 0.41<br><i>p</i> = 0.07  |          |                                | rho = -0.07<br><i>p</i> = 0.85 |

Regression analysis was performed with Spearman's rank correlation and significance determined using Bonferroni correction (dark green:  $p < 0.01$ ; light green:  $p < 0.05$ ; orange:  $p < 0.10$ ; red:  $p > 0.10$ ).

**Suppl. Table S3: Correlations between immune-related biomarkers and relevant laboratory values in MDS patients.**

|                           | Casp1+                       | PD1+ | PD-L1+                        |
|---------------------------|------------------------------|------|-------------------------------|
| Neutrophils [ $10^9/l$ ]  | $\rho = 0.57$<br>$p = 0.009$ |      | $\rho = -0.58$<br>$p = 0.007$ |
| Monocytes [ $10^9/l$ ]    | $\rho = 0.52$<br>$P = 0.02$  |      |                               |
| Hemoglobin [g/l]          |                              |      | $\rho = -0.45$<br>$p = 0.046$ |
| Thrombocytes [ $10^9/l$ ] |                              |      |                               |
| BM cellularity [%]        |                              |      |                               |
| BM blasts [%]             |                              |      |                               |
| CRP [mg/L]                |                              |      |                               |

Dark green:  $p < 0.01$ ; Light green:  $p < 0.05$ ; Orange:  $p < 0.10$ ; Red:  $p > 0.10$

Regression analysis was performed using Spearman's rank correlation and probabilities adjusted using Bonferroni correction.

**Suppl. Table S4: Correlations of immune-related biomarkers with survival endpoints in MDS patients.**

|                                        | <b>Casp1<sup>high</sup><br/>(n=10)</b> | <b>Casp1<sup>low</sup><br/>(n=10)</b> |           | <b>PD1<sup>high</sup><br/>(n=10)</b> | <b>PD1<sup>low</sup><br/>(n=10)</b> |           | <b>PD-L1<sup>high</sup><br/>(n=10)</b> | <b>PD-L1<sup>low</sup><br/>(n=10)</b> |           |
|----------------------------------------|----------------------------------------|---------------------------------------|-----------|--------------------------------------|-------------------------------------|-----------|----------------------------------------|---------------------------------------|-----------|
| <b>Time to treatment (TTT)</b>         | 123<br>(28-1015)                       | 81.5<br>(8-2632)                      | <i>ns</i> | 98.5<br>(8-1015)                     | 73<br>(9-2632)                      | <i>ns</i> | 81.5<br>(9-123)                        | 289<br>(8-2632)                       | <i>ns</i> |
| <b>Progression-free survival (PFS)</b> | 253.5<br>(15-1264)                     | 271<br>(73-3576)                      | <i>ns</i> | 559<br>(88-1264)                     | 205.5<br>(15-3576)                  | <i>ns</i> | 308<br>(73-1264)                       | 216.5<br>(15-3576)                    | <i>ns</i> |
| <b>Leukemia-free survival (LFS)</b>    | 356<br>(15-1799)                       | 260<br>(130-655)                      | <i>ns</i> | 979.5<br>(138-1799)                  | 205.5<br>(15-1247)                  | <i>ns</i> | 356<br>(130-1799)                      | 151<br>(15-1519)                      | <i>ns</i> |
| <b>Overall survival (OS)</b>           | 356<br>(15-1799)                       | 321<br>(158-663)                      | <i>ns</i> | 984<br>(138-1799)                    | 252<br>(15-1247)                    | <i>ns</i> | 356<br>(183-1799)                      | 158<br>(15-1697)                      | <i>ns</i> |

Median with ranges in days are shown for all parameters. Patients were stratified according to the median H-score of Casp1 (7), PD1 (3), and PD-L1 (2.25) in high and low expressor groups. Kaplan-Meier estimator with log-rank test was used for the survival analysis with censoring for allo HSCT at time of transplantation. Significance was determined at  $p<0.05$ .

Suppl. Figure S1: Immunohistochemical stainings from representative MDS patients.

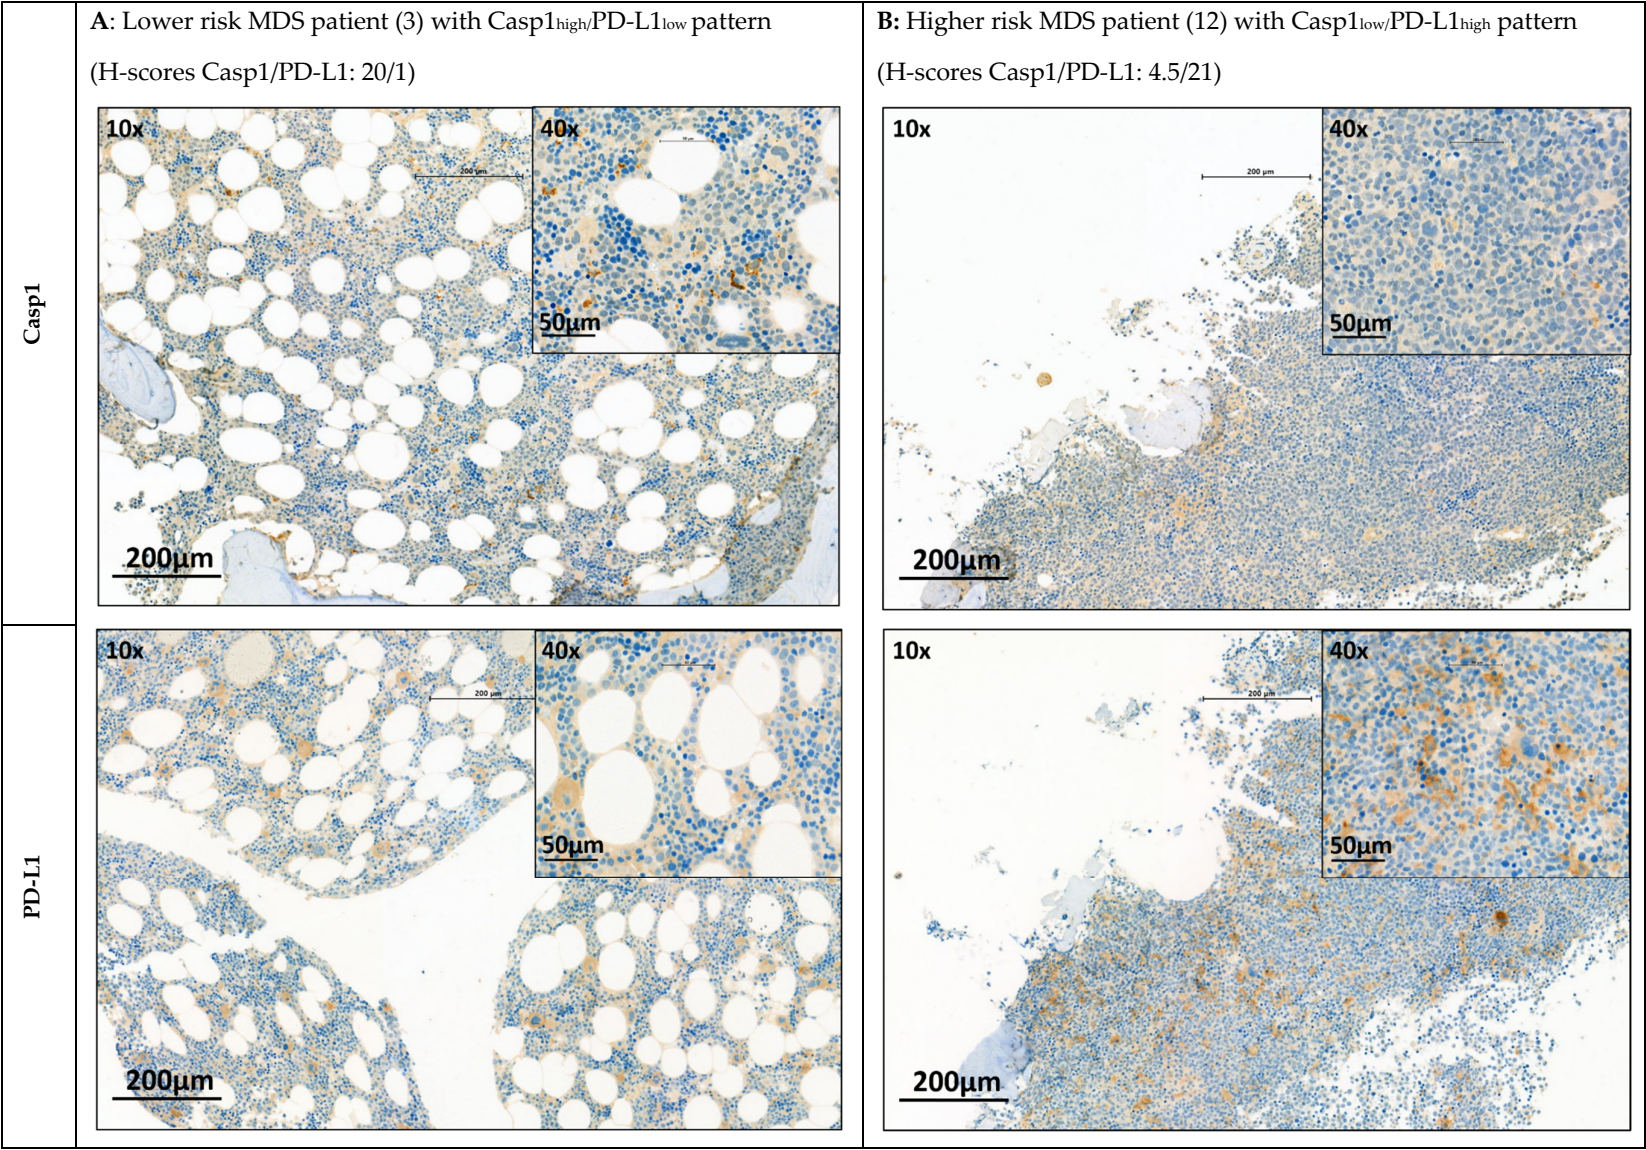

Patient numbers according to Suppl. Table 1 (see patients with #).

Suppl. Figure S2: Immunohistochemical stainings from representative controls.

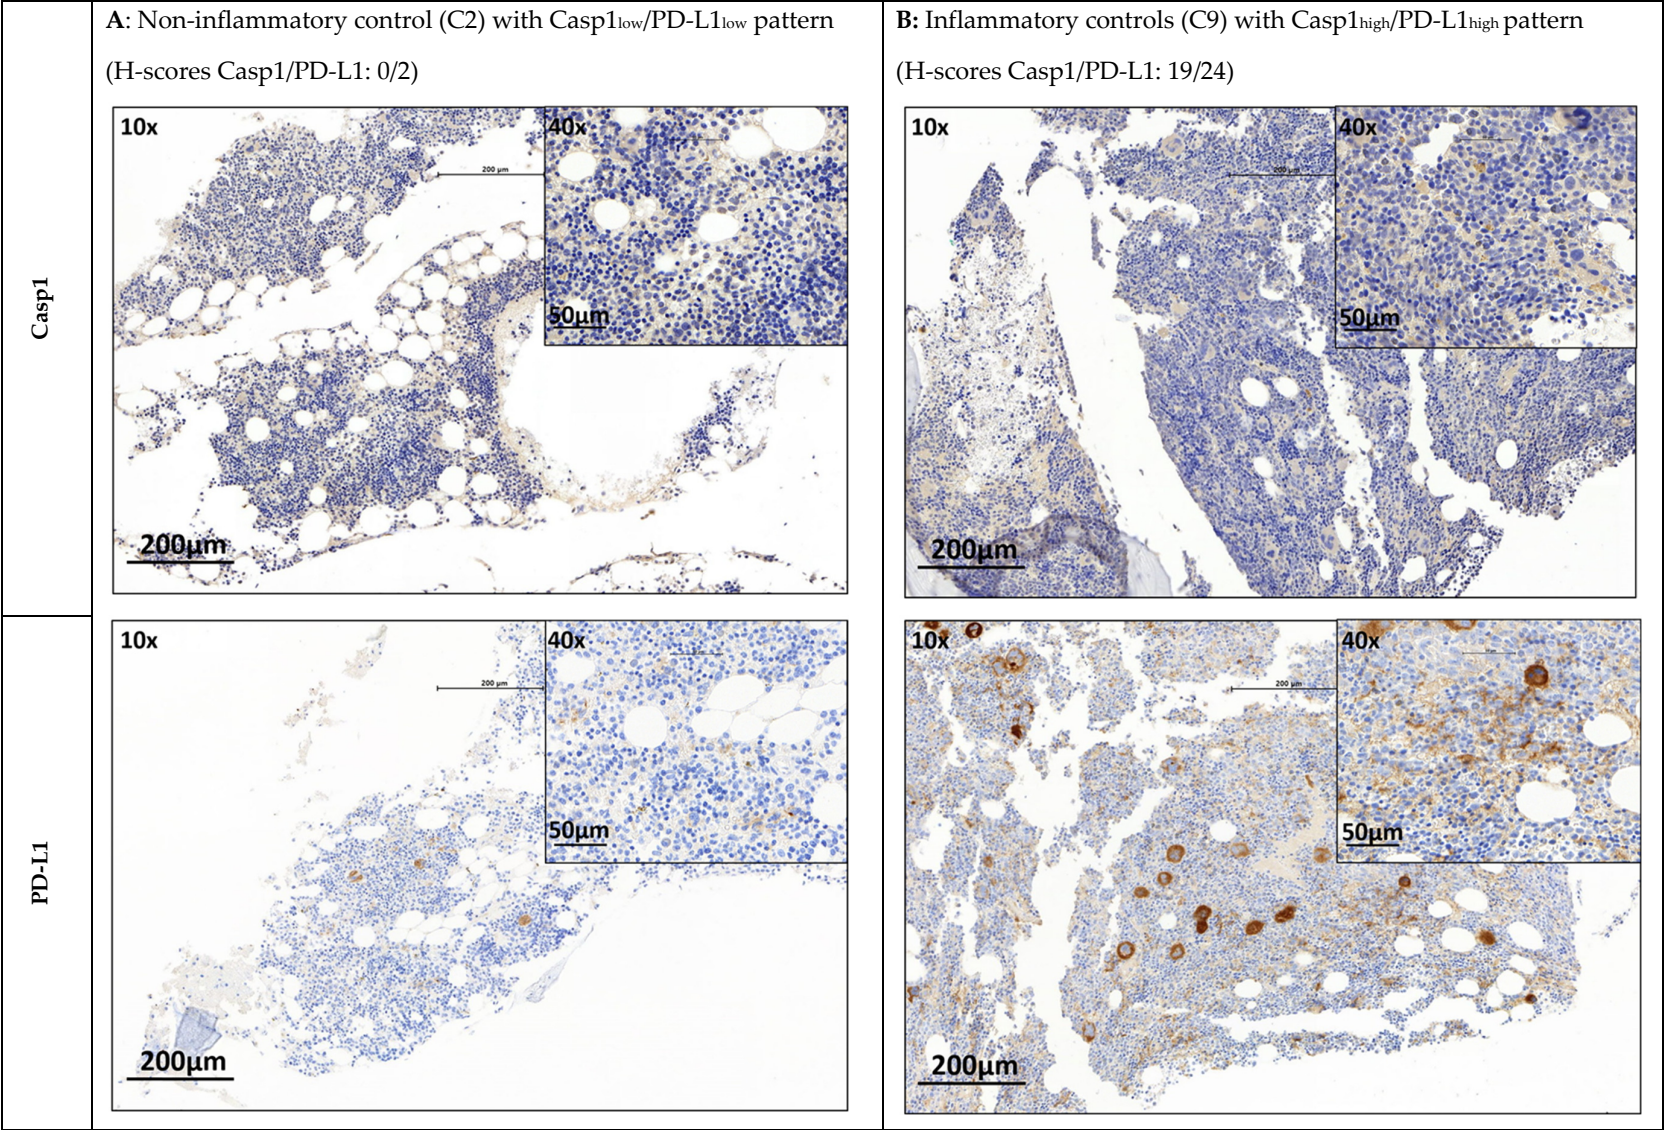

Numbers of controls according to Suppl. Table 1 (see controls with #).

**Suppl. Figure S3: TTT in lower and higher risk MDS patients.**

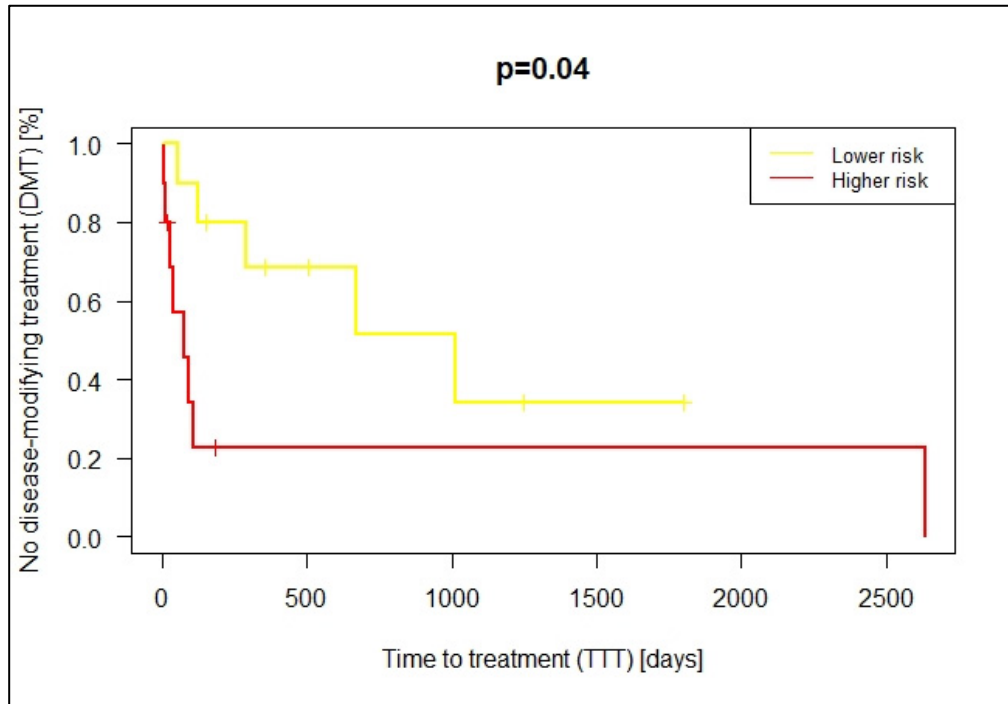

First disease-modifying treatment (DMT) as shown in Suppl. table 1. DMTs included HMA (n=11), allo HSCT (n=4), Cyclosporine/Thymoglobulin (n=3), Lenalidomide (n=2), Hydroxyurea (n=2) and Cytarabine/Idarubicine (n=1). Log rank test was used with significance determined at  $p<0.05$ .

**Suppl. Figure S4: Predictive power of Casp1 as classifier for MDS disease stages.**

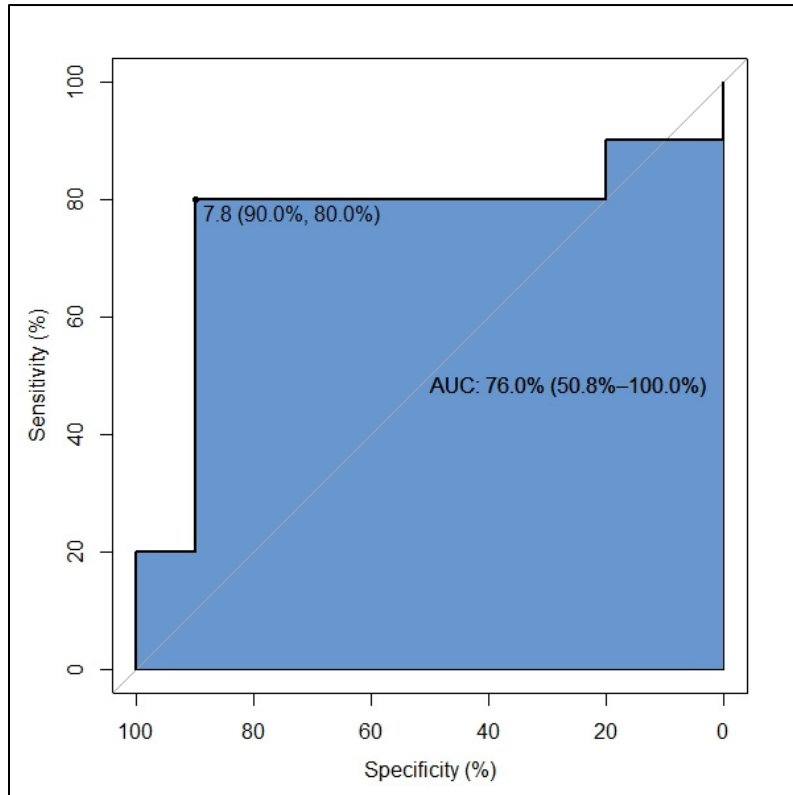

Receiver operating characteristic (ROC) analysis of Casp1 expression as classifier for lower and higher risk MDS disease stage. Casp1 H-score of 7.8 was used as cut-off, which resulted in a specificity of 90% and sensitivity of 80%. Due to low patient numbers, the area under the curve (AUC) resulted in a large 95% confidence interval.
